# Supplementary material for: The Mantle Transcriptome of Chamelea gallina (Mollusca: Bivalvia) and Shell Biomineralization
Source: MDPI journal article supplement (doi:10.3390/ani12091196), 2022-05-06
Supplement: s1 [file s1]

|                    | <b>Senigallia (S)</b> |    |    |    |                    | <b>Silvi Marina (SM)</b> |    |    |    |
|--------------------|-----------------------|----|----|----|--------------------|--------------------------|----|----|----|
| <b>Temperature</b> | W                     | Sp | Su | Au | <b>Temperature</b> | W                        | Sp | Su | Au |
| W                  |                       |    |    |    | W                  |                          |    |    |    |
| Sp                 | **                    |    |    |    | Sp                 | **                       |    |    |    |
| Su                 | **                    | ** |    |    | Su                 | **                       | ** |    |    |
| Au                 | **                    | ns | ** |    | Au                 | **                       | ns | ** |    |
| <b>Salinity</b>    | W                     | Sp | Su | Au | <b>Salinity</b>    | W                        | Sp | Su | Au |
| W                  |                       |    |    |    | W                  |                          |    |    |    |
| Sp                 | **                    |    |    |    | Sp                 | ns                       |    |    |    |
| Su                 | **                    | ns |    |    | Su                 | **                       | ** |    |    |
| Au                 | **                    | ** | ** |    | A                  | **                       | ** | ** |    |
| <b>Chlorophyll</b> | W                     | Sp | Su | Au | <b>Chlorophyll</b> | W                        | Sp | Su | Au |
| W                  |                       |    |    |    | W                  |                          |    |    |    |
| Sp                 | **                    |    |    |    | Sp                 | ns                       |    |    |    |
| Su                 | **                    | *  |    |    | Su                 | **                       | ** |    |    |
| Au                 | **                    | ns | ** |    | Au                 | ns                       | ns | ** |    |

**Supplementary Table S7.** Results from Tukey's test pairwise comparison among seasons (W: winter, Sp: spring, Su: summer, Au: autumn) at the sampling stations of S (left columns) and SM (right columns). ns (not significant) =  $P \geq 0.01$ ; \* =  $0.01 > P \geq 0.001$ ; \*\* =  $0.001 > P \geq 0.0001$ .
