# Supplementary material for: The Mantle Transcriptome of Chamelea gallina (Mollusca: Bivalvia) and Shell Biomineralization
Source: MDPI journal article supplement (doi:10.3390/ani12091196), 2022-05-06
Supplement: s1 [file s1]

| <b>SILVI MARINA(SM)</b> | <b>Temperature</b> | <b>Salinity</b> | <b>Chlorophyll</b> |
|-------------------------|--------------------|-----------------|--------------------|
| Sep                     | 25.41(1.39)        | 37.57(0.06)     | 0.23(0.08)         |
| Oct                     | 21.38(0.99)        | 37.91(0.09)     | 0.27(0.10)         |
| Nov                     | 17.24(1.49)        | 38.01(0.03)     | 0.51(0.33)         |
| Dec                     | 13.22(0.84)        | 37.83(0.20)     | 1.06(0.37)         |
| Jan                     | 10.38(0.43)        | 37.10(0.17)     | 0.82(0.24)         |
| Feb                     | 11.12(0.44)        | 36.96(0.02)     | 0.54(0.20)         |
| Mar                     | 12.26(0.46)        | 37.10(0.16)     | 0.42(0.26)         |
| Apr                     | 14.32(1.59)        | 37.02(0.12)     | 0.73(0.27)         |
| May                     | 19.34(1.05)        | 37.28(0.05)     | 0.39(0.19)         |
| Jun                     | 22.71(1.30)        | 37.54(0.08)     | 0.29(0.13)         |
| Jul                     | 26.58(0.57)        | 37.56(0.13)     | 0.26(0.13)         |
| Aug                     | 28.21(0.59)        | 37.63(0.16)     | 0.24(0.12)         |
| Sep                     | 25.48(1.08)        | 37.90(0.08)     | 0.31(0.15)         |
| Autumn                  | 18.38(3.61)        | 37.93(0.13)     | 0.54(0.42)         |
| Winter                  | 11.27(0.94)        | 37.13(0.21)     | 0.67(0.29)         |
| Spring                  | 17.51(3.69)        | 37.21(0.23)     | 0.49(0.30)         |
| Summer                  | 26.76(1.34)        | 37.66(0.17)     | 0.25(0.12)         |

**Supplementary Table S5.** Monthly and seasonally based mean values (values in parentheses represent the standard deviation) of temperature [°C], salinity [PSU] and chlorophyll-a [mg/m<sup>3</sup>] at the SM sampling site from September 2019 to September 2020.
