# Supplementary material for: The Mantle Transcriptome of Chamelea gallina (Mollusca: Bivalvia) and Shell Biomineralization
Source: MDPI journal article supplement (doi:10.3390/ani12091196), 2022-05-06
Supplement: s1 [file s1]

| <b>SENIGALLIA (S)</b> | <b>Temperature</b> | <b>Salinity</b> | <b>Chlorophyll</b> |
|-----------------------|--------------------|-----------------|--------------------|
| Sep                   | 25.04 (1.62)       | 37.12 (0.07)    | 0.33 (0.16)        |
| Oct                   | 20.54 (0.87)       | 37.41 (0.16)    | 0.43 (0.15)        |
| Nov                   | 16.90 (1.43)       | 37.43 (0.18)    | 0.61 (0.35)        |
| Dec                   | 0.33 (0.16)        | 36.39 (0.45)    | 1.21 (0.46)        |
| Jan                   | 10.64 (0.25)       | 36.25 (0.17)    | 1.47 (0.69)        |
| Feb                   | 11.04 (0.54)       | 35.86 (0.33)    | 0.73 (0.25)        |
| Mar                   | 11.90 (0.42)       | 36.82 (0.16)    | 0.69 (0.31)        |
| Apr                   | 13.61 (1.28)       | 36.47 (0.27)    | 0.62 (0.22)        |
| May                   | 17.93 (1.55)       | 37.15 (0.47)    | 0.36 (0.13)        |
| Jun                   | 21.49 (1.14)       | 37.14 (0.14)    | 0.32 (0.14)        |
| Jul                   | 25.86 (0.61)       | 36.58 (0.16)    | 0.29 (0.14)        |
| Aug                   | 27.48 (0.41)       | 36.88 (0.23)    | 0.23 (0.13)        |
| Sep                   | 25.00 (0.98)       | 37.32 (0.04)    | 0.34 (0.21)        |
| Autumn                | 17.78 (3.48)       | 37.20 (0.44)    | 0.64 (0.41)        |
| Winter                | 11.24 (0.72)       | 36.21 (0.40)    | 1.05 (0.60)        |
| Spring                | 16.47 (3.45)       | 36.92 (0.45)    | 0.48 (0.24)        |
| Summer                | 26.03 (1.39)       | 36.89 (0.32)    | 0.27 (0.14)        |

**Supplementary Table S4.** Monthly and seasonally based mean values (values in parentheses represent the standard deviation) of temperature [°C], salinity [PSU] and chlorophyll-a [mg/m<sup>3</sup>] at the S sampling site from September 2019 to September 2020.
