# Supplementary material for: The Mantle Transcriptome of Chamelea gallina (Mollusca: Bivalvia) and Shell Biomineralization
Source: MDPI journal article supplement (doi:10.3390/ani12091196), 2022-05-06
Supplement: s1 [file s1]

**Supplementary Table S6.** P-values obtained from the two-way ANOVA for the comparisons of the seasonal temperature [°C], salinity [PSU] and chlorophyll concentration [mg/m<sup>3</sup>] between the study areas. ns (not significant) =  $P \geq 0.01$ ; \* =  $0.01 > P \geq 0.001$ ; \*\* =  $0.001 > P \geq 0.0001$ .

| <b>Factor</b> | <b>Temperature</b> | <b>Salinity</b> | <b>Chlorophyll</b> |
|---------------|--------------------|-----------------|--------------------|
| season        | **                 | ns              | ns                 |
| station       | ns                 | ns              | ns                 |
| interaction   | ns                 | **              | **                 |
