# Supplementary material for: The Mantle Transcriptome of Chamelea gallina (Mollusca: Bivalvia) and Shell Biomineralization
Source: MDPI journal article supplement (doi:10.3390/ani12091196), 2022-05-06
Supplement: s1 [file s1]

**Supplementary Tables S1.** Summary statistics of *Chamelea gallina* mantle transcriptome assembly, quality assessment, and differential expression analysis.

- Mantle transcriptome sequencing report and reads trimming

|                                | S1         | S2         | S3         | SM1        | SM2        | SM3        |
|--------------------------------|------------|------------|------------|------------|------------|------------|
| Total raw reads                | 47,739,560 | 51,088,924 | 49,821,466 | 58,129,840 | 49,994,598 | 50,797,182 |
| Phred $\geq$ Q30 (%)           | 93.87      | 93.83      | 94.12      | 93.47      | 93.52      | 93.19      |
| GC (%)                         | 43.55      | 43.3       | 43.08      | 43.54      | 44         | 44.2       |
| Cleaned reads (after trimming) | 44,708,546 | 48,441,290 | 47,371,234 | 54,383,456 | 46,642,426 | 47,003,834 |

- Cleaned reads assembly using Trinity v2.12

| Trinity Assembly    |        |
|---------------------|--------|
| Total transcripts   | 46,293 |
| %GC                 | 37.88% |
| N50                 | 452    |
| Min length (bp)     | 201    |
| Max length (bp)     | 30,079 |
| Average length (bp) | 436.27 |

- BUSCO (v5.0.0) short summary

|                              | n     | %    |
|------------------------------|-------|------|
| Complete and single-copy (S) | 4,090 | 77.2 |
| Complete and duplicated (D)  | 281   | 5.3  |
| Fragmented (F)               | 193   | 3.6  |
| Missing (M)                  | 731   | 13.9 |
| Total BUSCO groups searched  | 5,295 | 82.5 |

- Differential Expression analysis (test vs control: Senigallia (S) vs Silvi Marina (SM)) performed with CLC genomics workbench v12.0.

| <b>Differentially Expressed Genes (DEGs)</b> | <b>total</b> | <b>upregulated</b> | <b>downregulated</b> |
|----------------------------------------------|--------------|--------------------|----------------------|
| FDR <0.05, fold change >4                    | 364          | 95                 | 269                  |
