# Supplementary material for: The Mantle Transcriptome of Chamelea gallina (Mollusca: Bivalvia) and Shell Biomineralization
Source: MDPI journal article supplement (doi:10.3390/ani12091196), 2022-05-06
Supplement: s1 [file s1]

| Temperature          |        | Senigallia (S) |        |        |        |
|----------------------|--------|----------------|--------|--------|--------|
|                      |        | Winter         | Spring | Summer | Autumn |
| Silvi Marina<br>(SM) | Winter | ns             | ns     | ns     | ns     |
|                      | Spring |                |        |        |        |
|                      | Summer |                |        |        |        |
|                      | Autumn |                |        |        |        |
| Salinity             |        | Senigallia (S) |        |        |        |
|                      |        | Winter         | Spring | Summer | Autumn |
| Silvi Marina<br>(SM) | Winter | **             | **     | **     | **     |
|                      | Spring |                |        |        |        |
|                      | Summer |                |        |        |        |
|                      | Autumn |                |        |        |        |
| Chlorophyll          |        | Senigallia (S) |        |        |        |
|                      |        | Winter         | Spring | Summer | Autumn |
| Silvi Marina<br>(SM) | Winter | **             | ns     | ns     | ns     |
|                      | Spring |                |        |        |        |
|                      | Summer |                |        |        |        |
|                      | Autumn |                |        |        |        |

**Supplementary Table S8.** P-values obtained from the Tukey's test for the comparisons of the seasonal temperature [°C], salinity [PSU] and chlorophyll concentration [mg/m<sup>3</sup>] between the study areas. ns (not significant) =  $P \geq 0.01$ ; \* =  $0.01 > P \geq 0.001$ ; \*\* =  $0.001 > P \geq 0.0001$ .
